# Supplementary material for: ARPEGGIO: Automated Reproducible Polyploid EpiGenetic GuIdance workflOw
Source: PubMed Central journal article supplement (PMC8285871; doi:10.1186/s12864-021-07845-2), 2021-07-17

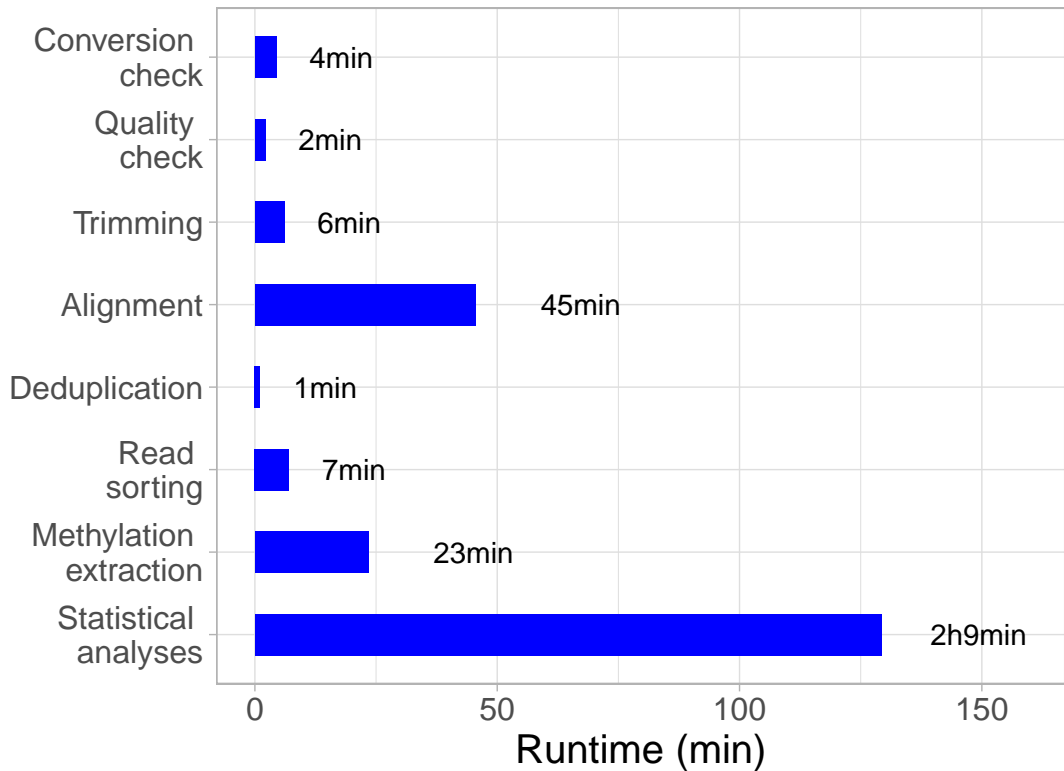

Supplement: 12864_2021_7845_MOESM2_ESM.pdf [file 12864_2021_7845_MOESM2_ESM.pdf]
