# Supplementary material for: ARPEGGIO: Automated Reproducible Polyploid EpiGenetic GuIdance workflOw
Source: PubMed Central journal article supplement (PMC8285871; doi:10.1186/s12864-021-07845-2), 2021-07-17
Supplement: 12864_2021_7845_MOESM4_ESM.pdf [file 12864_2021_7845_MOESM4_ESM.pdf]

## Read statistics about datasets used to compare EAGLE-RC against concatenation method

The following tables provide all the numbers behind the comparison between EAGLE-RC against the concatenation method. Here's a list with all the samples used and their corresponding accession number:

- *A. halleri*: SAMD00208469
- *A. lyrata*: SAMD00208470
- *A. halleri* G1: SAMD00208471
- *A. lyrata* G1: SAMD00208472
- *M. luteus* 1, 2, 3, 4: SRX2618908, SRX2618909, SRX2618910, SRX2618911
- *M. guttatus* 1, 2, 3, 4: SRX2618912, SRX2618913, SRX2618914, SRX2618915
- *G. arboreum* 1, 2: SRR3219104, SRR3219105
- *G. raimondii* 1, 2: SRR3219088, SRR3219089

|                                               | <i>A. halleri</i>           | <i>A. lyrata</i>            | <i>A. halleri</i>                                    | <i>A. lyrata</i>      |
|-----------------------------------------------|-----------------------------|-----------------------------|------------------------------------------------------|-----------------------|
| Method                                        | concatenated                |                             | <u>EAGLE-RC based classification</u><br>read-sorting |                       |
| Total reads <u>(TR)</u>                       | 40'160'266                  | 44'895'570                  | 40'160'266                                           | 44'895'570            |
| Uniquely mapped <u>(% from TR)</u>            | 21'012'844<br>(52.3%)       | 23'067'388<br>(51.4%)       | 22'119'312<br>(55.3%)                                | 24'433'418<br>(54.7%) |
| Not uniquely mapped                           | 19'147'422                  | 21'828'182                  | 18'040'954                                           | 20'462'152            |
| Duplicated reads <u>(% from TR)</u>           | 5'293'580<br><u>(13.2%)</u> | 7'585'268<br><u>(16.9%)</u> | 5'338'990<br>(24.1%)                                 | 7'897'614<br>(32.3%)  |
| Uniquely mapped and deduplicated <u>(UMD)</u> | 15'719'264                  | 15'482'120                  | 16'780'322                                           | 16'535'804            |
| Correct reads <u>(% from UMD)</u>             | 15'013'508<br>(95.5%)       | 14'418'656<br>(91.0%)       | 14'953'178<br>(89.1%)                                | 14'417'190<br>(87.2%) |
| Ambiguous                                     | -                           | -                           | 1'633'420                                            | 1'859'612             |
| Wrong reads                                   | 705'756                     | 1'063'464                   | 193'724                                              | 259'002               |
| Error %                                       | 4.49 %                      | 6.87%                       | 1.30 %                                               | 1.57 %                |

|                                               | <i>A. halleri</i> G1       | <i>A. lyrata</i> G1        | <i>A. halleri</i> G1                                 | <i>A. lyrata</i> G1   |
|-----------------------------------------------|----------------------------|----------------------------|------------------------------------------------------|-----------------------|
| Method                                        | concatenated               |                            | <u>EAGLE-RC based classification</u> read<br>sorting |                       |
| Total reads <u>(TR)</u>                       | 80'445'492                 | 124'215'824                | 80'445'492                                           | 124'215'824           |
| Uniquely mapped <u>(% from TR)</u>            | 20'321'978<br>(25.3%)      | 31'692'092<br>(25.5%)      | 21'468'920<br>(26.7%)                                | 32'969'572<br>(26.6%) |
| Not uniquely mapped                           | 60'123'514                 | 92'523'732                 | 58'976'572                                           | 91'246'252            |
| Duplicated reads <u>(% from TR)</u>           | 1'523'726<br><u>(1.9%)</u> | 2'765'528<br><u>(2.2%)</u> | 1'626'582<br>(7.6%)                                  | 2'903'264<br>(8.8%)   |
| Uniquely mapped and deduplicated <u>(UMD)</u> | 18'798'252                 | 28'926'564                 | 19'842'338                                           | 30'066'308            |
| Correct reads <u>(% from UMD)</u>             | 18'147'370<br>(96.5%)      | 27'480'258<br>(95.0%)      | 18'625'582<br>(93.9%)                                | 28'269'980<br>(94.0%) |
| Ambiguous                                     | -                          | -                          | 1'016'786                                            | 1'399'008             |
| Wrong reads                                   | 650'882                    | 1'446'306                  | 199'970                                              | 397'320               |
| Error %                                       | 3.46 %                     | 5.00%                      | 1.01 %                                               | 1.32 %                |

|                                               | <i>Mimulus guttatus</i> 1   | <i>Mimulus luteus</i> 1     | <i>Mimulus guttatus</i> 1                            | <i>Mimulus luteus</i> 1     |
|-----------------------------------------------|-----------------------------|-----------------------------|------------------------------------------------------|-----------------------------|
| Method                                        | concatenated                |                             | <u>EAGLE-RC based classification</u><br>read sorting |                             |
| Total reads <u>(TR)</u>                       | 11'198'784                  | 14'540'898                  | 11'198'784                                           | 14'540'898                  |
| Uniquely mapped <u>(% from TR)</u>            | 2'612'195<br>(23.3%)        | 6'312'383<br>(43.4%)        | 2'575'518<br>(23.0%)                                 | 5'908'489<br>(40.6%)        |
| Not uniquely mapped                           | 8'586'589                   | 8'228'515                   | 8'623'266                                            | 8'632'409                   |
| Duplicated reads <u>(% from TR)</u>           | 1'151'447<br>(44.1%)        | 2'300'413<br>(36.44%)       | 1'249'814<br>(48.5%)                                 | 2'027'318<br>(34.3%)        |
| Uniquely mapped and deduplicated <u>(UMD)</u> | 1'460'748                   | 4'011'970                   | 1'325'704                                            | 3'881'171                   |
| Correct reads <u>(% from UMD)</u>             | 1'069'658<br><u>(73.2%)</u> | 3'623'197<br><u>(90.3%)</u> | 976'317<br><u>(73.6%)</u>                            | 3'236'631<br><u>(83.4%)</u> |
| Ambiguous                                     | -                           | -                           | 250'067                                              | 556'666                     |
| Wrong reads                                   | 391'090                     | 388'773                     | 99'320                                               | 87'874                      |
| Error %                                       | 26.77%                      | 9.69%                       | 7.49%                                                | 2.26%                       |

|                                               | <i>Mimulus guttatus</i> 2   | <i>Mimulus luteus</i> 2     | <i>Mimulus guttatus</i> 2                            | <i>Mimulus luteus</i> 2     |
|-----------------------------------------------|-----------------------------|-----------------------------|------------------------------------------------------|-----------------------------|
| Method                                        | concatenated                |                             | <u>EAGLE-RC based classification</u><br>read sorting |                             |
| Total reads <u>(TR)</u>                       | 11'125'236                  | 14'423'855                  | 11'125'236                                           | 14'423'855                  |
| Uniquely mapped <u>(% from TR)</u>            | 2'608'418<br>(23.4%)        | 6'291'151<br>(43.6%)        | 2'571'997<br>(23.1%)                                 | 5'889'892<br>(40.8%)        |
| Not uniquely mapped                           | 8'516'818                   | 8'132'704                   | 8'553'239                                            | 8'533'963                   |
| Duplicated reads <u>(% from TR)</u>           | 1'149'555<br>(44.1%)        | 2'297'202<br>(36.5%)        | 1'248'440<br>(48.5%)                                 | 2'026'983<br>(34.4%)        |
| Uniquely mapped and deduplicated <u>(UMD)</u> | 1'458'863                   | 3'993'949                   | 1'323'557                                            | 3'862'909                   |
| Correct reads <u>(% from UMD)</u>             | 1'067'813<br><u>(73.2%)</u> | 3'606'521<br><u>(90.3%)</u> | 974'850<br><u>(73.7%)</u>                            | 3'219'702<br><u>(83.3%)</u> |
| Ambiguous                                     | -                           | -                           | 249'601                                              | 555'449                     |
| Wrong reads                                   | 391'050                     | 387'428                     | 99'106                                               | 87'758                      |
| Error %                                       | 26.81%                      | 9.70%                       | 7.49%                                                | 2.27%                       |

|                                               | <i>Mimulus guttatus</i> 3   | <i>Mimulus luteus</i> 3     | <i>Mimulus guttatus</i> 3                            | <i>Mimulus luteus</i> 3     |
|-----------------------------------------------|-----------------------------|-----------------------------|------------------------------------------------------|-----------------------------|
| Method                                        | concatenated                |                             | <u>EAGLE-RC based classification</u><br>read sorting |                             |
| Total reads <u>(TR)</u>                       | 10'955'877                  | 14'136'379                  | 10'955'877                                           | 14'136'379                  |
| Uniquely mapped <u>(% from TR)</u>            | 2'494'759<br>(22.8%)        | 6'016'962<br>(42.6%)        | 2'459'689<br>(22.5%)                                 | 5'629'101<br>(39.8%)        |
| Not uniquely mapped                           | 8'461'118                   | 8'119'417                   | 8'496'188                                            | 8'507'278                   |
| Duplicated reads <u>(% from TR)</u>           | 1'098'495<br>(44.0%)        | 2'193'358<br>(36.5%)        | 1'192'556<br>(48.5%)                                 | 1'933'785<br>(34.4%)        |
| Uniquely mapped and deduplicated <u>(UMD)</u> | 1'396'264                   | 3'823'604                   | 1'267'133                                            | 3'695'316                   |
| Correct reads <u>(% from UMD)</u>             | 1'022'678<br><u>(73.2%)</u> | 3'446'647<br><u>(90.1%)</u> | 932'804<br><u>(73.6%)</u>                            | 3'083'952<br><u>(83.5%)</u> |
| Ambiguous                                     | -                           | -                           | 238'974                                              | 526'097                     |
| Wrong reads                                   | 373'586                     | 376'957                     | 95'355                                               | 85'267                      |
| Error %                                       | 26.76%                      | 9.86%                       | 7.53%                                                | 2.31%                       |

|                                               | <i>Mimulus guttatus</i> 4 | <i>Mimulus luteus</i> 4     | <i>Mimulus guttatus</i> 4                            | <i>Mimulus luteus</i> 4     |
|-----------------------------------------------|---------------------------|-----------------------------|------------------------------------------------------|-----------------------------|
| Method                                        | concatenated              |                             | <u>EAGLE-RC based classification</u><br>read sorting |                             |
| Total reads <u>(TR)</u>                       | 10'646'892                | 13'738'854                  | 10'646'892                                           | 13'738'854                  |
| Uniquely mapped <u>(% from TR)</u>            | 2'433'041<br>(22.9%)      | 5'866'025<br>(42.7%)        | 2'398'688<br>(22.5%)                                 | 5'485'383<br>(39.9%)        |
| Not uniquely mapped                           | 8'213'851                 | 7'872'829                   | 8'247'915                                            | 8'253'471                   |
| Duplicated reads <u>(% from TR)</u>           | 1'068'453<br>(43.9%)      | 2'137'718<br>(36.4%)        | 1'159'882<br>(48.4%)                                 | 1'882'322<br>(34.3%)        |
| Uniquely mapped and deduplicated <u>(UMD)</u> | 1'364'588                 | 3'728'307                   | 1'238'806                                            | 3'603'061                   |
| Correct reads <u>(% from UMD)</u>             | 998'982<br><u>(73.2%)</u> | 3'357'807<br><u>(90.1%)</u> | 911'356<br><u>(73.6%)</u>                            | 3'003'804<br><u>(83.4%)</u> |
| Ambiguous                                     | -                         | -                           | 233'955                                              | 515'291                     |
| Wrong reads                                   | 365'606                   | 370'500                     | 93'495                                               | 83'966                      |
| Error %                                       | 26.79%                    | 9.94%                       | 7.55%                                                | 2.33%                       |

|                                               | <i>Gossypium arboreum</i> 1   | <i>Gossypium raimondii</i> 1  | <i>Gossypium arboreum</i> 1                                  | <i>Gossypium raimondii</i> 1  |
|-----------------------------------------------|-------------------------------|-------------------------------|--------------------------------------------------------------|-------------------------------|
| Method                                        | concatenated                  |                               | <u>EAGLE-RC based classification</u> <del>read-sorting</del> |                               |
| Total reads <u>(TR)</u>                       | 432'844'852                   | 356'699'260                   | 432'844'852                                                  | 356'699'260                   |
| Uniquely mapped <u>(% from TR)</u>            | 279'996'748<br>(64.7%)        | 273'814'708<br>(76.8%)        | 280'386'284<br>(64.8%)                                       | 278'732'236<br>(78.1%)        |
| Not uniquely mapped                           | 152'848'104                   | 82'884'552                    | 152'458'568                                                  | 77'967'024                    |
| Duplicated reads <u>(% from TR)</u>           | 18'846'046<br>(6.7%)          | 13'284'372<br>(4.8%)          | 18'879'306<br>(6.7%)                                         | 13'697'054 (4.9%)             |
| Uniquely mapped and deduplicated <u>(UMD)</u> | 261'150'702                   | 260'530'336                   | 261'506'978                                                  | 265'035'182                   |
| Correct reads <u>(% from UMD)</u>             | 260'132'278<br><u>(99.6%)</u> | 259'423'814<br><u>(99.6%)</u> | 260'022'724<br><u>(99.4%)</u>                                | 262'945'068<br><u>(99.2%)</u> |
| Ambiguous                                     | -                             |                               | 1'132'490                                                    | 1'613'104                     |
| Wrong reads                                   | 1'018'424                     | 1'106'522                     | 351'764                                                      | 477'010                       |
| Error %                                       | 0.00390%                      | 0.00425%                      | 0.00134%                                                     | 0.00179%                      |

|                                               | <i>Gossypium arboreum</i> 2   | <i>Gossypium raimondii</i> 2  | <i>Gossypium arboreum</i> 2                                  | <i>Gossypium raimondii</i> 2  |
|-----------------------------------------------|-------------------------------|-------------------------------|--------------------------------------------------------------|-------------------------------|
| Method                                        | concatenated                  |                               | <u>EAGLE-RC based classification</u> <del>read-sorting</del> |                               |
| Total reads <u>(TR)</u>                       | 414'743'906                   | 299'026'128                   | 414'743'906                                                  | 299'026'128                   |
| Uniquely mapped <u>(% from TR)</u>            | 264'247'068<br>(63.7%)        | 235'500'124                   | 264'620'650<br>(63.8%)                                       | 240'038'096<br>(80.3%)        |
| Not uniquely mapped                           | 150'496'838                   | 63'526'004                    | 150'123'256                                                  | 58'988'032                    |
| Duplicated reads <u>(% from TR)</u>           | 17'572'436<br><u>(4.2%)</u>   | 10'850'322<br>(4.6%)          | 17'604'224<br><u>(4.2%)</u>                                  | 11'202'082<br>(4.7%)          |
| Uniquely mapped and deduplicated <u>(UMD)</u> | 246'674'632                   | 224'649'802                   | 247'016'426                                                  | 228'836'014                   |
| Correct reads <u>(% from UMD)</u>             | 245'718'300<br><u>(99.6%)</u> | 223'623'540<br><u>(99.5%)</u> | 245'626'594<br><u>(99.4%)</u>                                | 226'937'338<br><u>(99.2%)</u> |
| Ambiguous                                     | -                             | -                             | 1'059'410                                                    | 1'452'404                     |
| Wrong reads                                   | 956'332                       | 1'026'262                     | 330'422                                                      | 446'272                       |
| Error %                                       | 0.00389%                      | 0.00457%                      | 0.00134%                                                     | 0.00195%                      |
